# Supplementary figures and images for: CDK control pathways integrate cell size and ploidy information to control cell division
Source: eLife journal article supplement (doi:10.7554/elife.64592), 2021-06-11

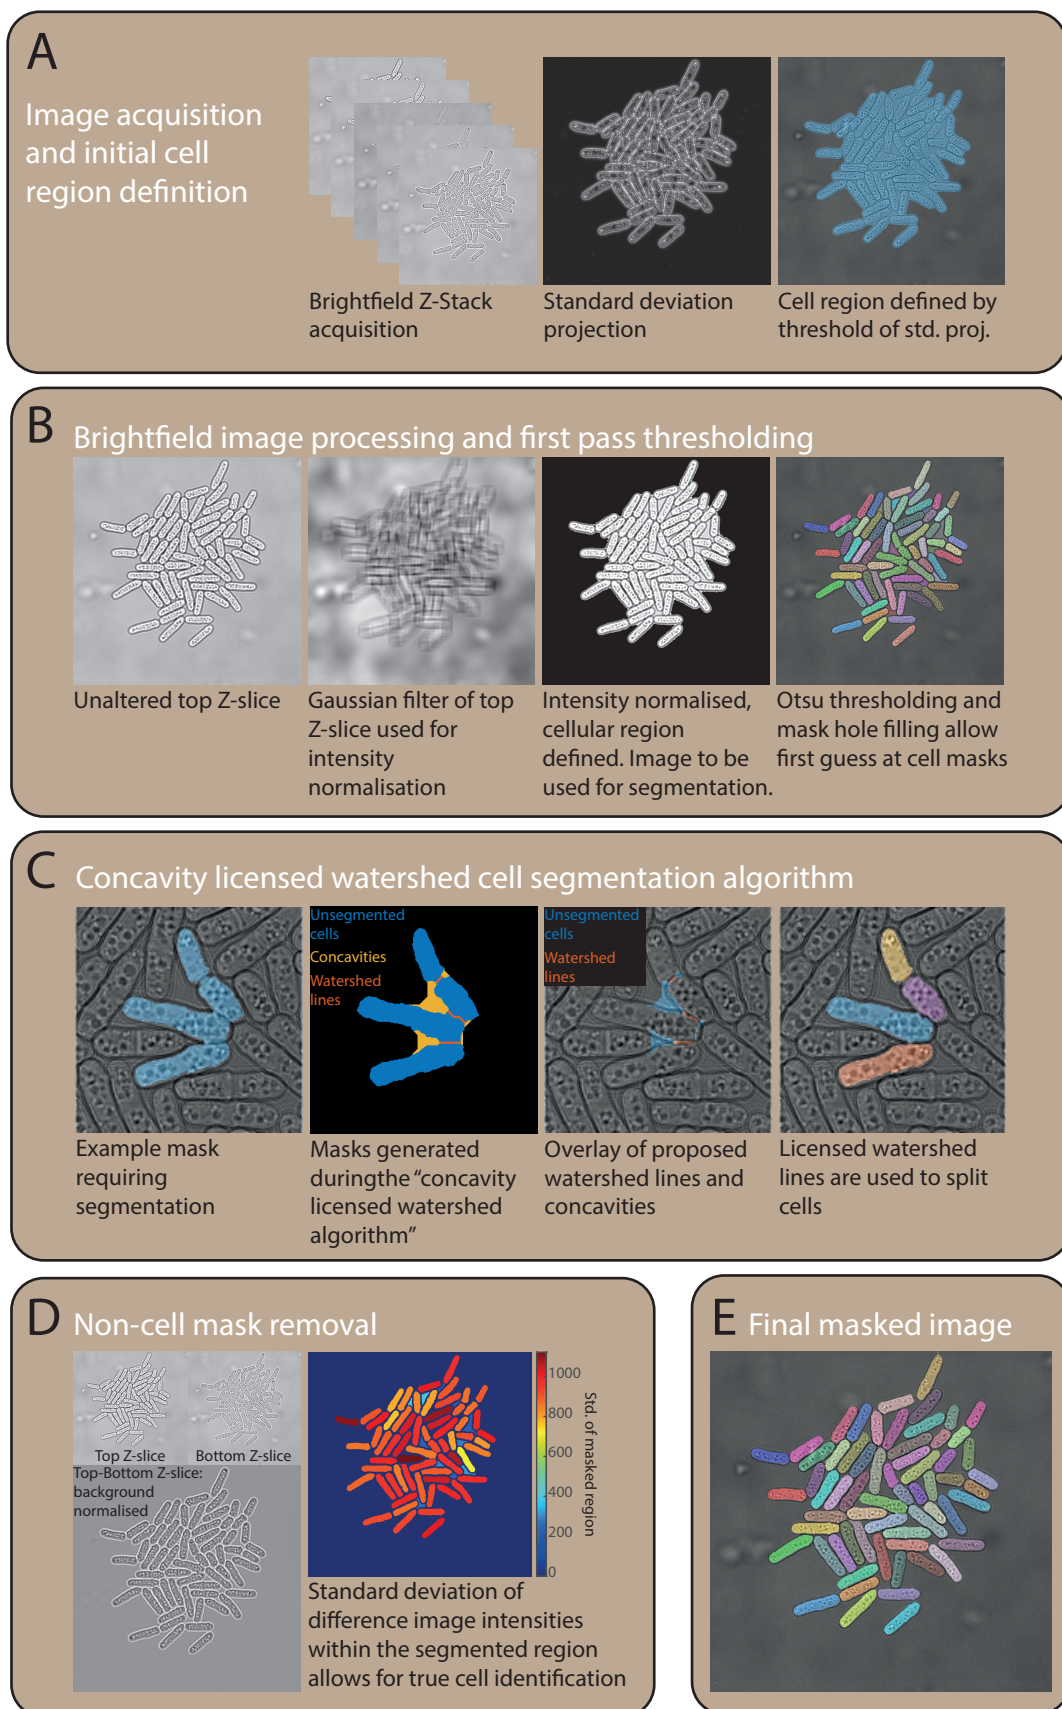

Figure 1, Figure Supplement 1

Supplement: supp [file elife_poa_e64592_Figure_1_figure_supplement_1.pdf › elife_poa_e64592_Figure_1_figure_supplement_1.pdf]

**a**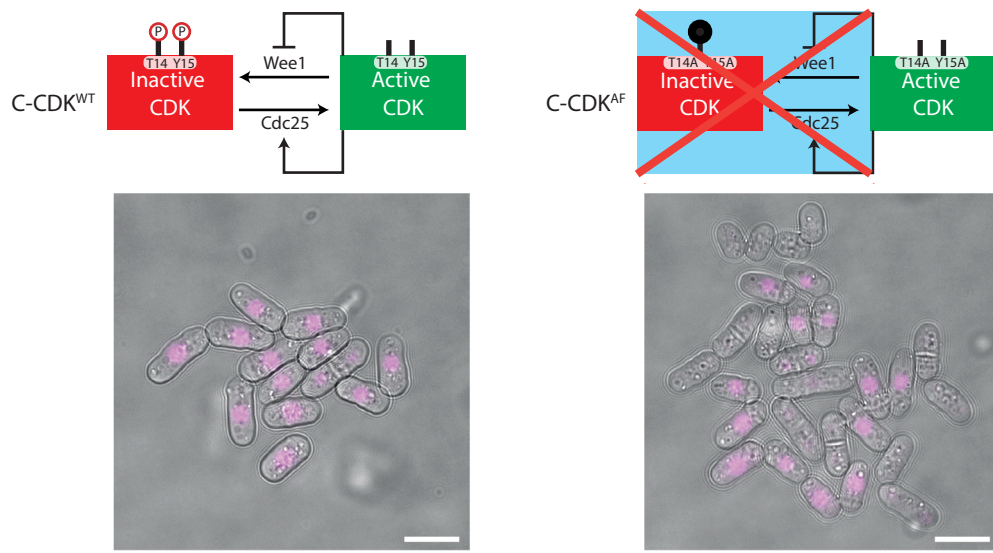**b**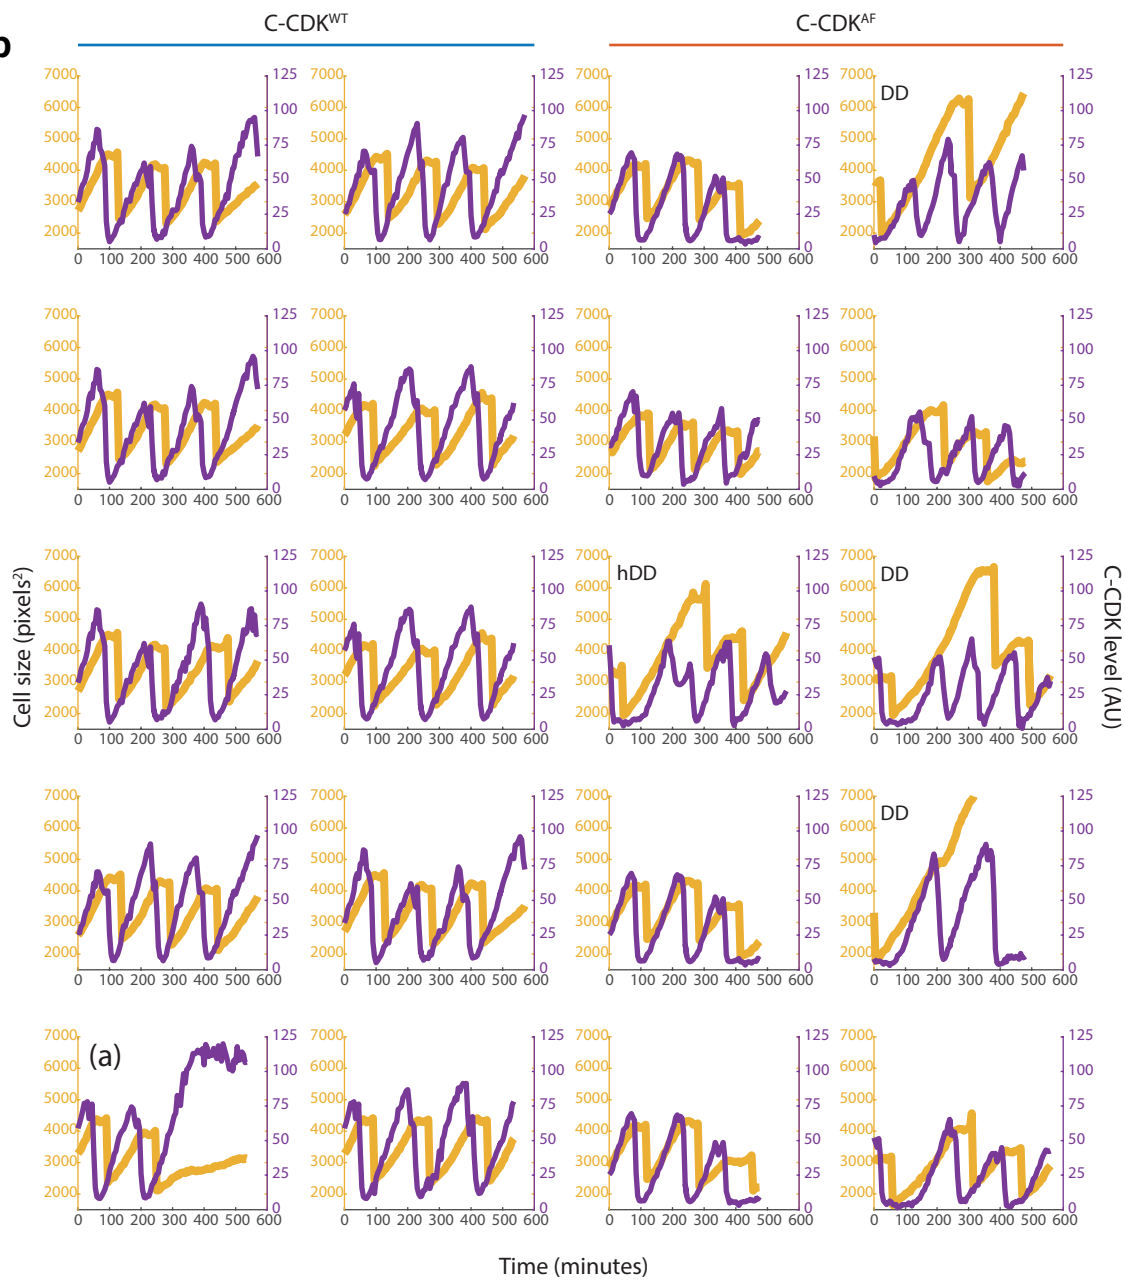**c**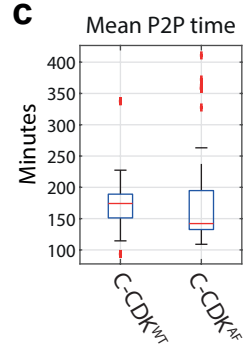**d**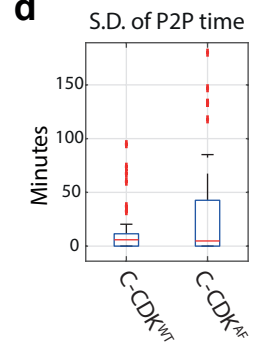

Figure 1, Figure Supplement 2

Supplement: supp [file elife_poa_e64592_Figure_1_figure_supplement_2.pdf › elife_poa_e64592_Figure_1_figure_supplement_2.pdf]

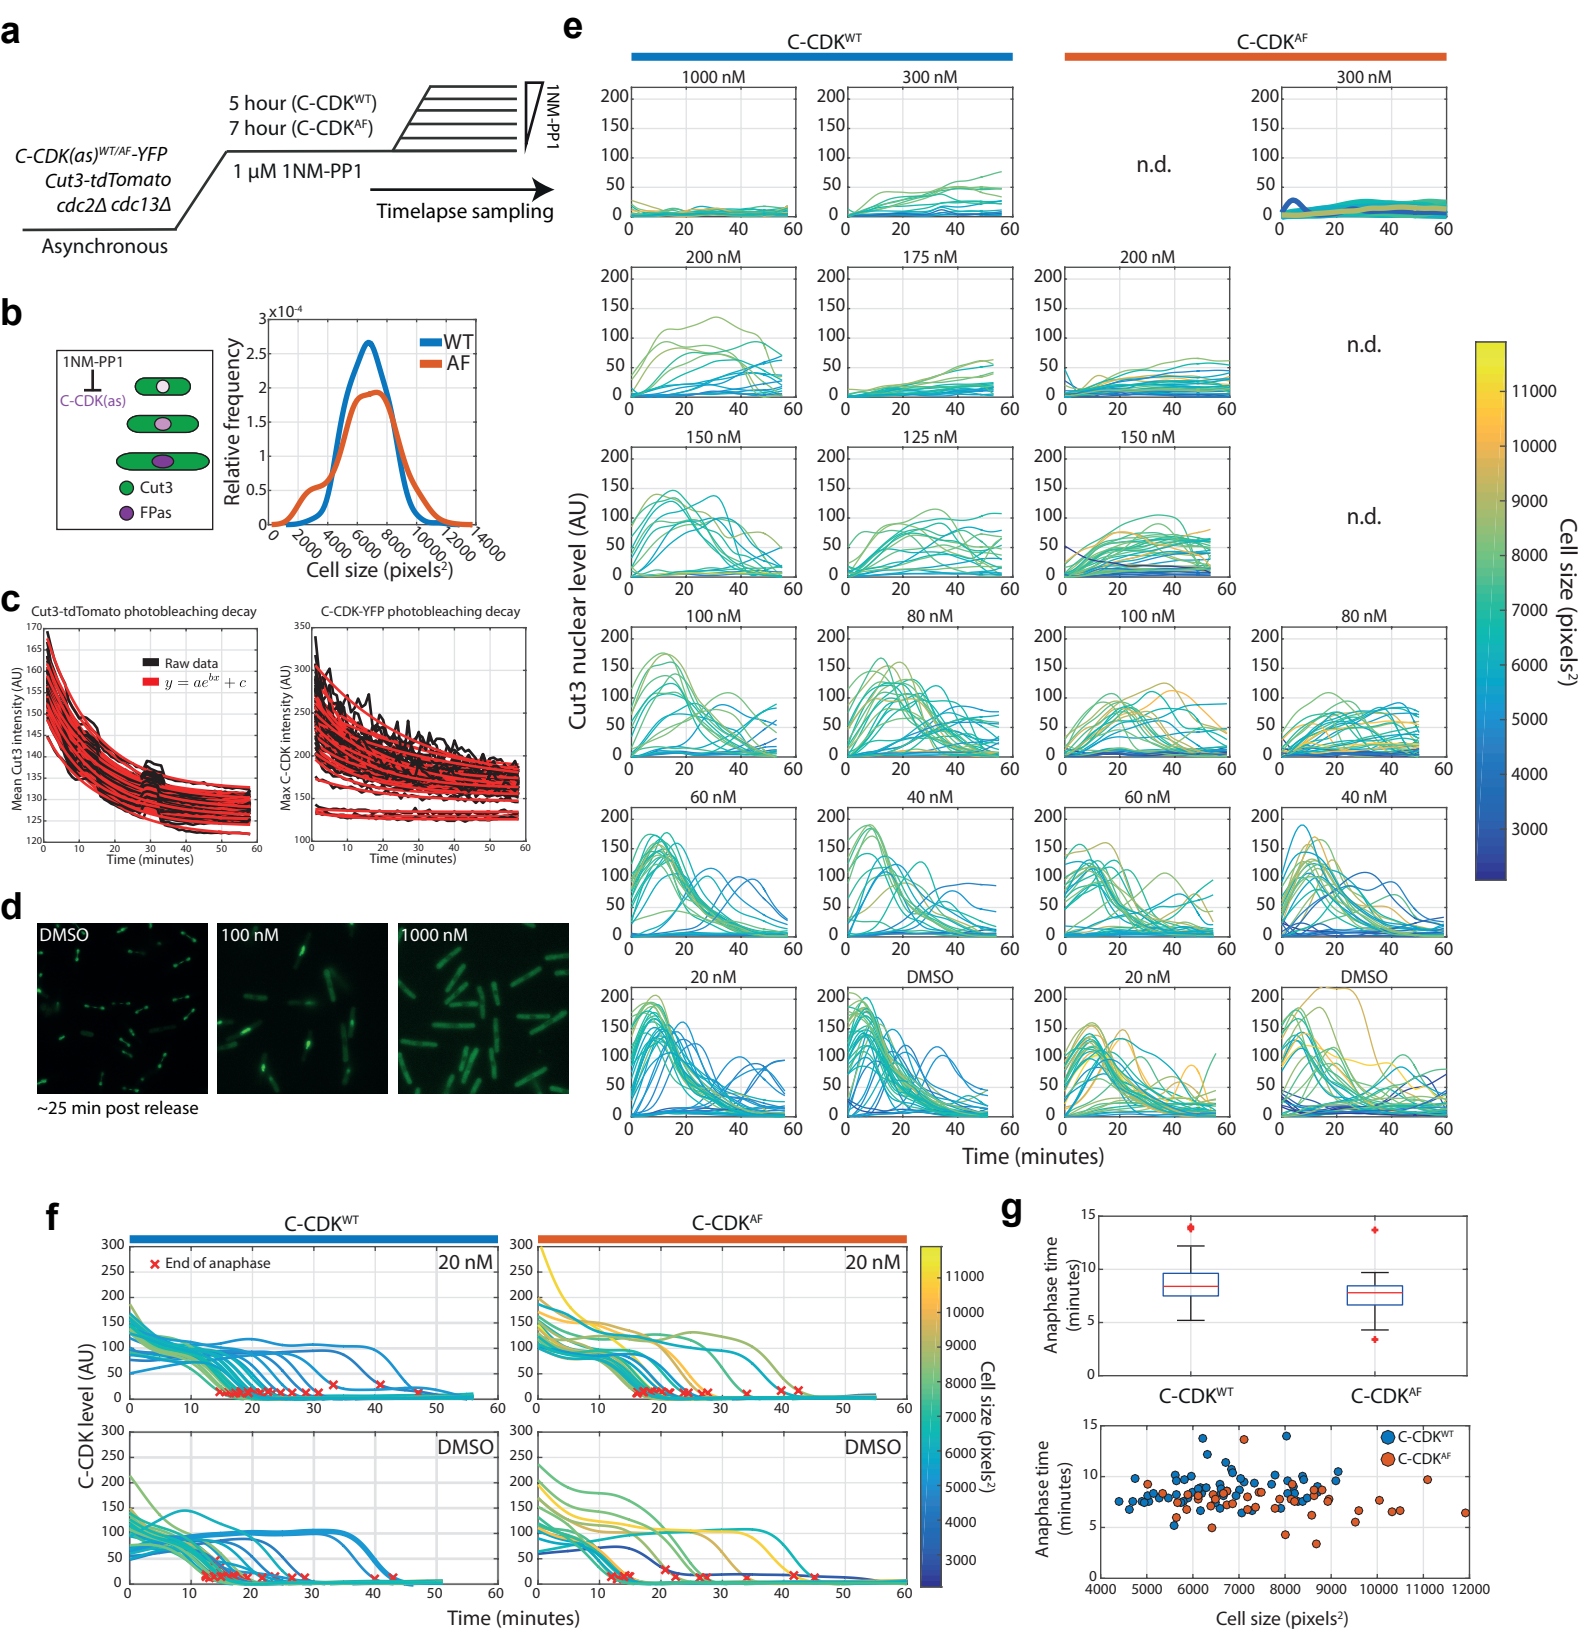

Figure 1, Figure Supplement 3

Supplement: supp [file elife_poa_e64592_Figure_1_figure_supplement_3.pdf › elife_poa_e64592_Figure_1_figure_supplement_3.pdf]

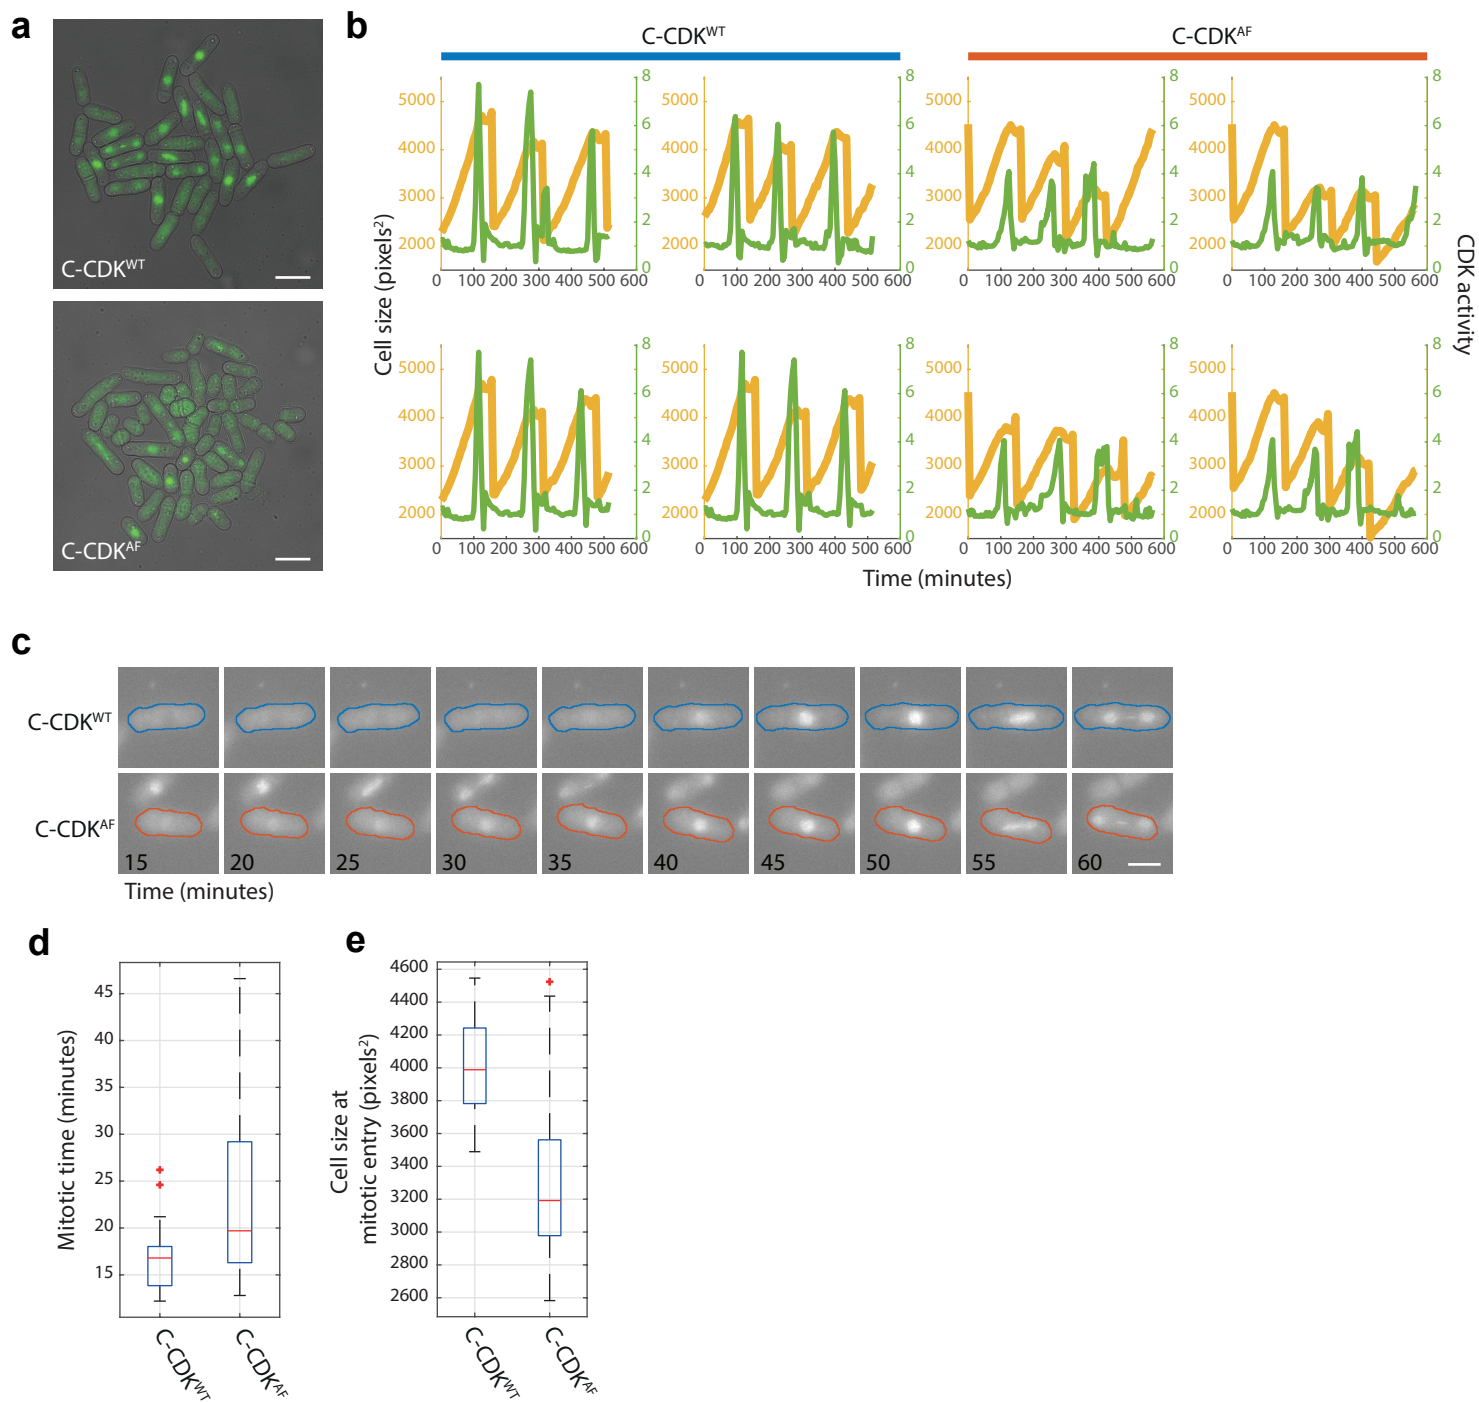

Figure 1, Figure Supplement 4

Supplement: supp [file elife_poa_e64592_Figure_1_figure_supplement_4.pdf › elife_poa_e64592_Figure_1_figure_supplement_4.pdf]

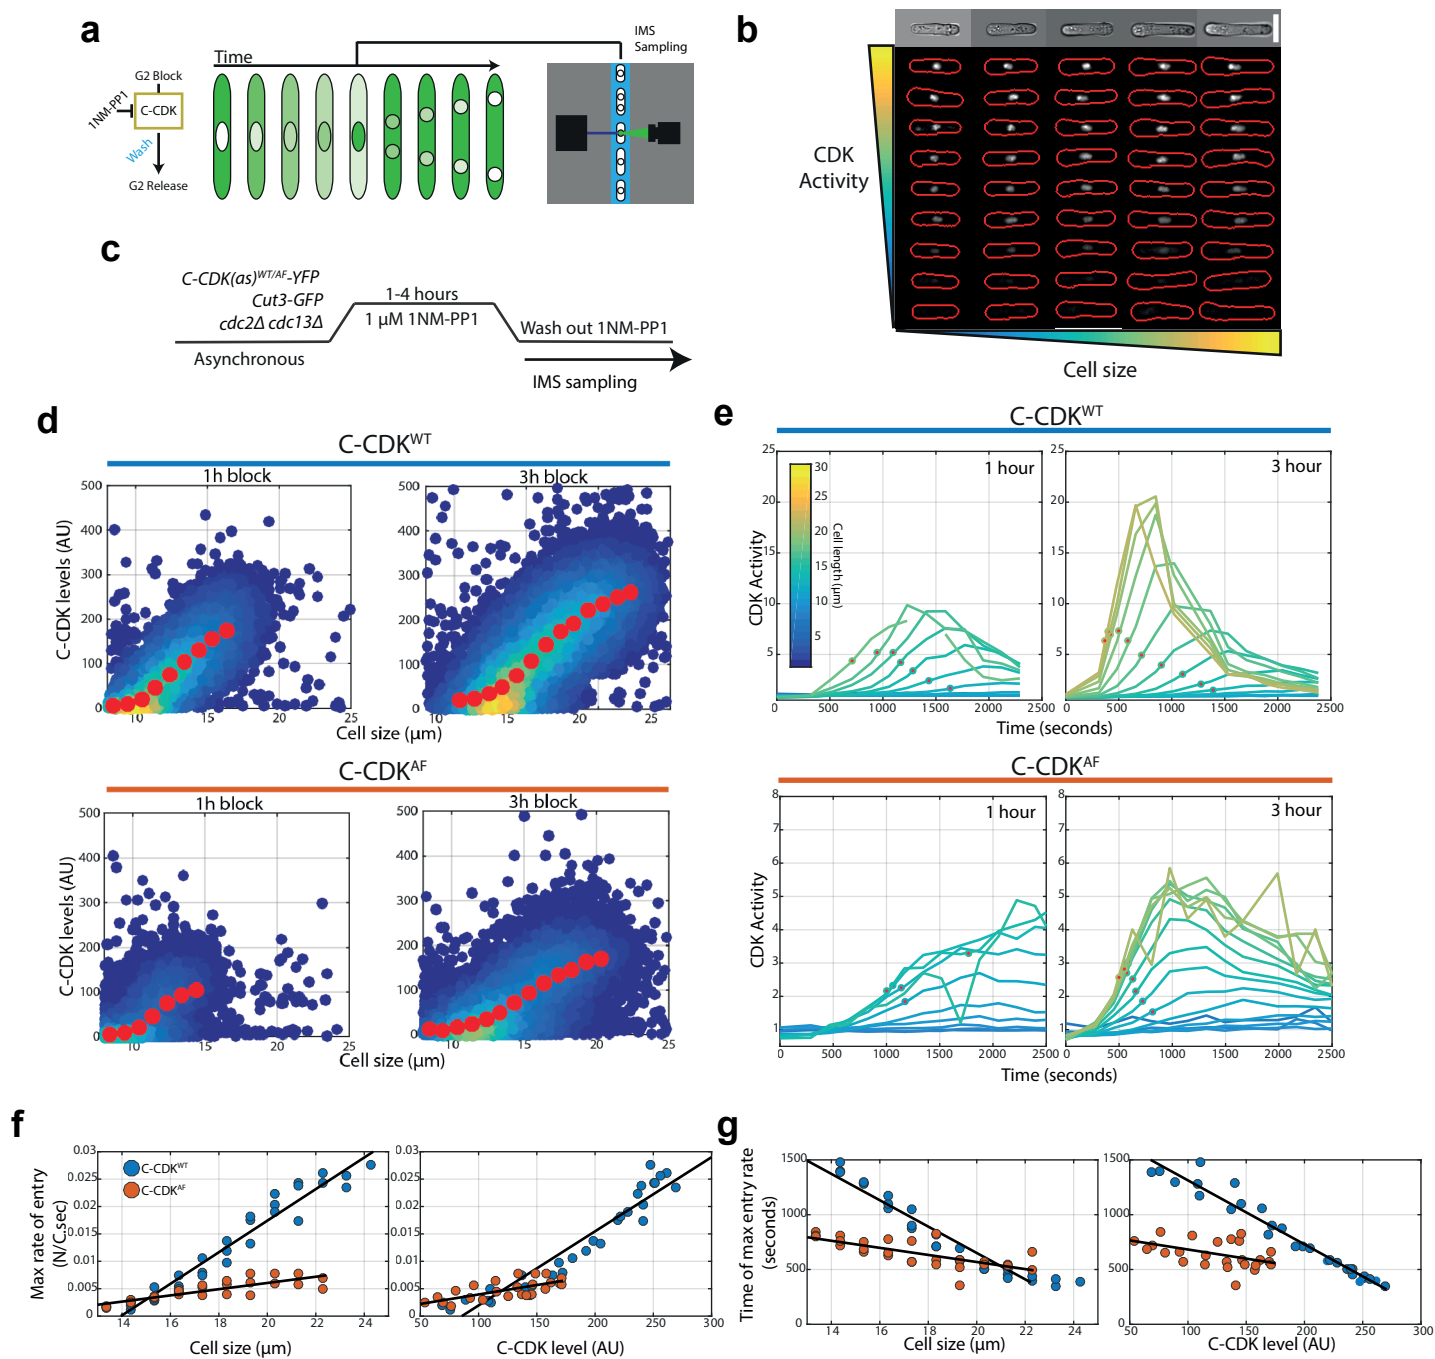

Figure 1, Figure Supplement 5

Supplement: supp [file elife_poa_e64592_Figure_1_figure_supplement_5.pdf › elife_poa_e64592_Figure_1_figure_supplement_5.pdf]

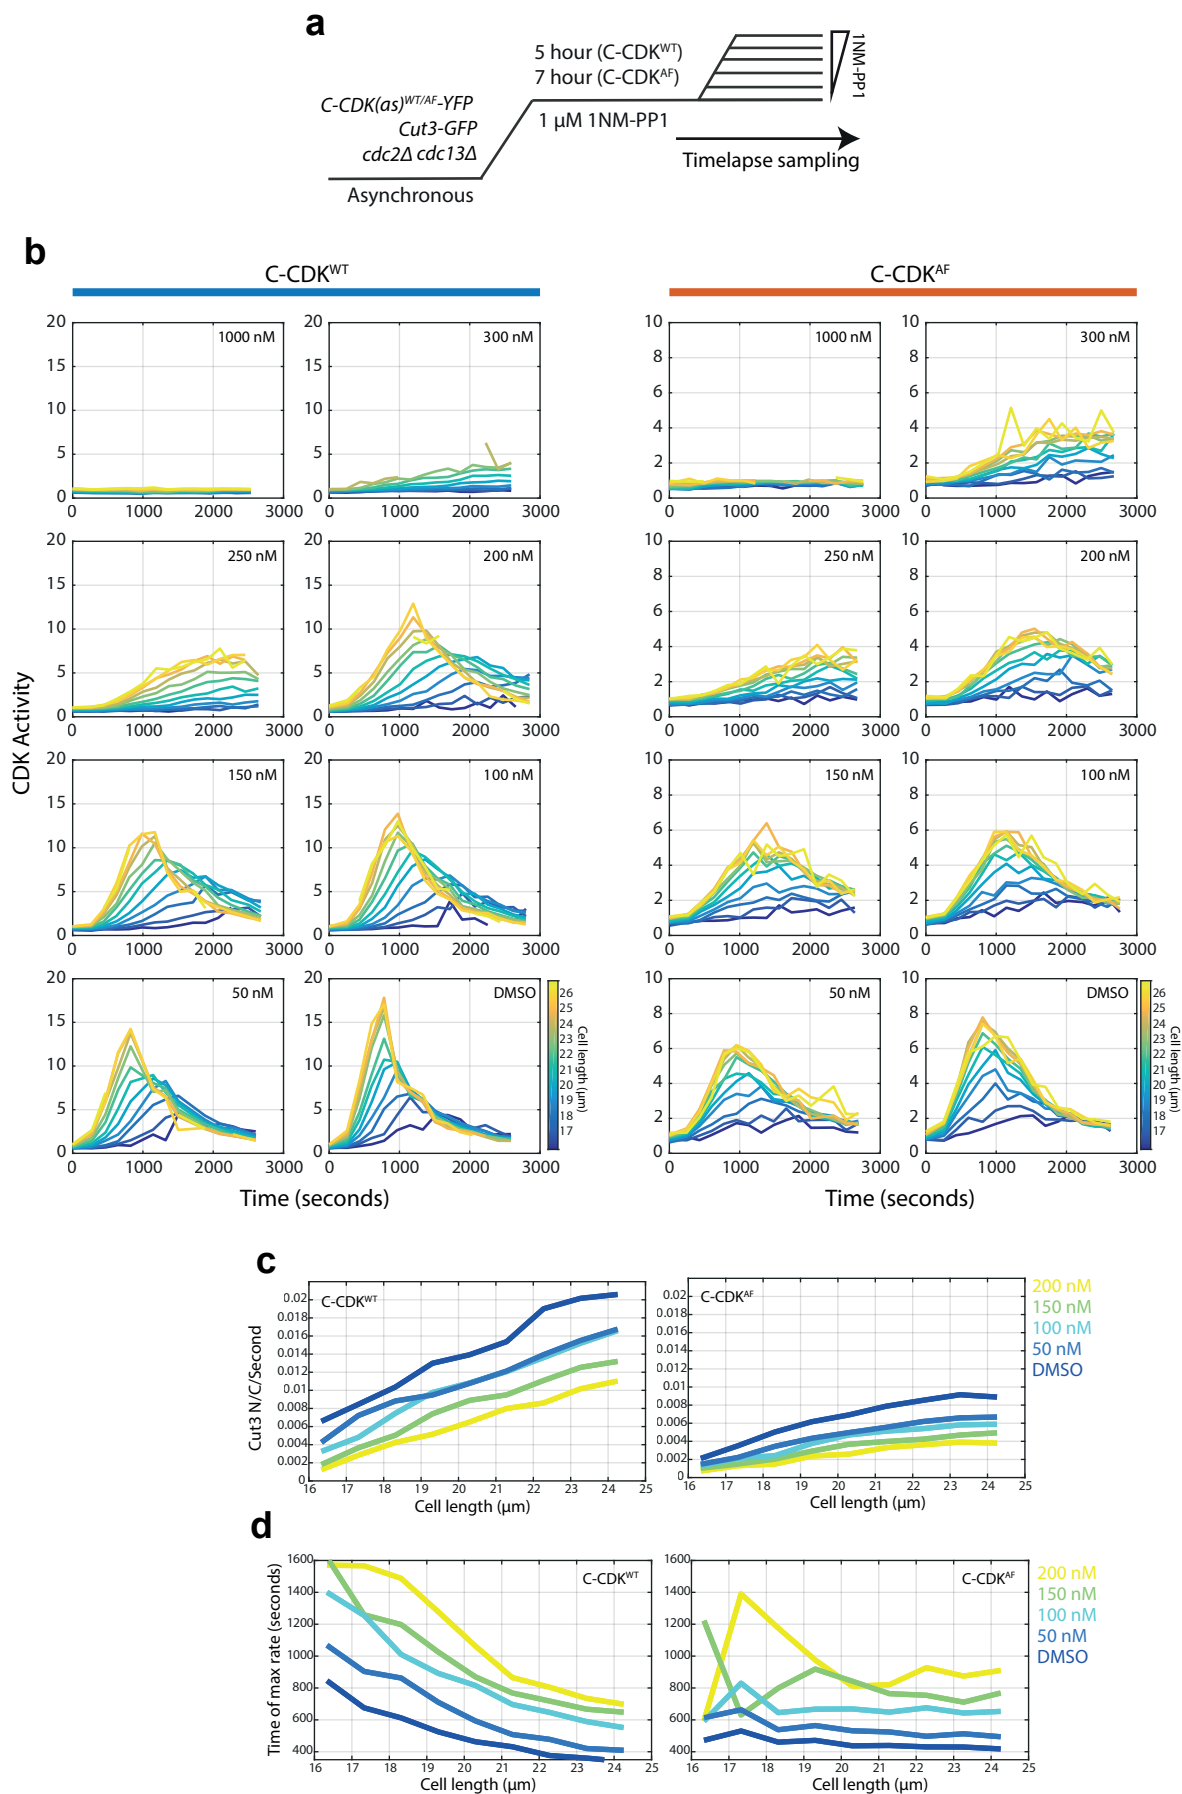

Figure 1, Figure Supplement 6

Supplement: supp [file elife_poa_e64592_Figure_1_figure_supplement_6.pdf › elife_poa_e64592_Figure_1_figure_supplement_6.pdf]

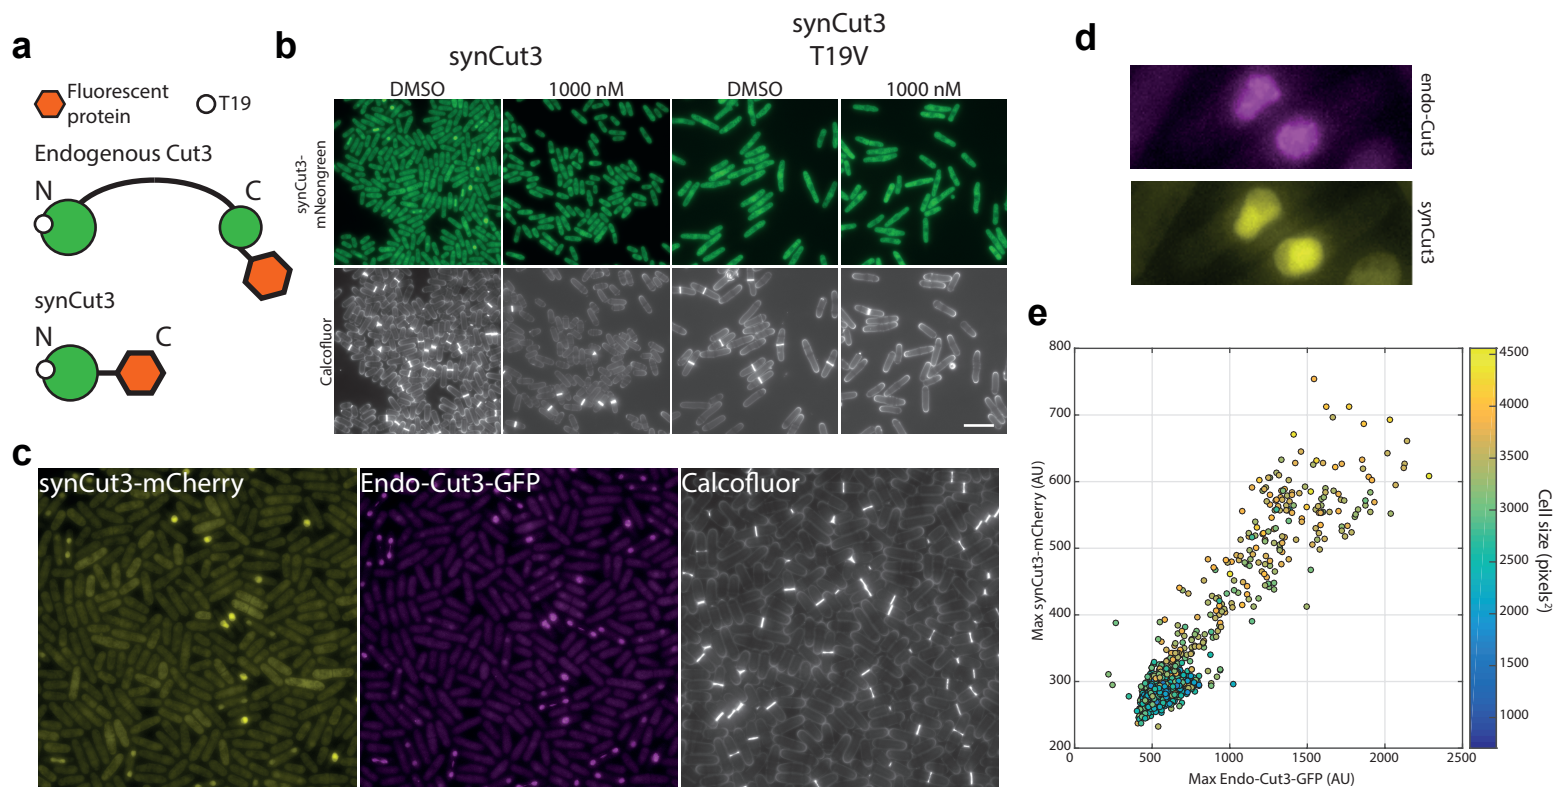

Figure 2, Figure Supplement 1

Supplement: supp [file elife_poa_e64592_Figure_2_figure_supplement_1.pdf › elife_poa_e64592_Figure_2_figure_supplement_1.pdf]

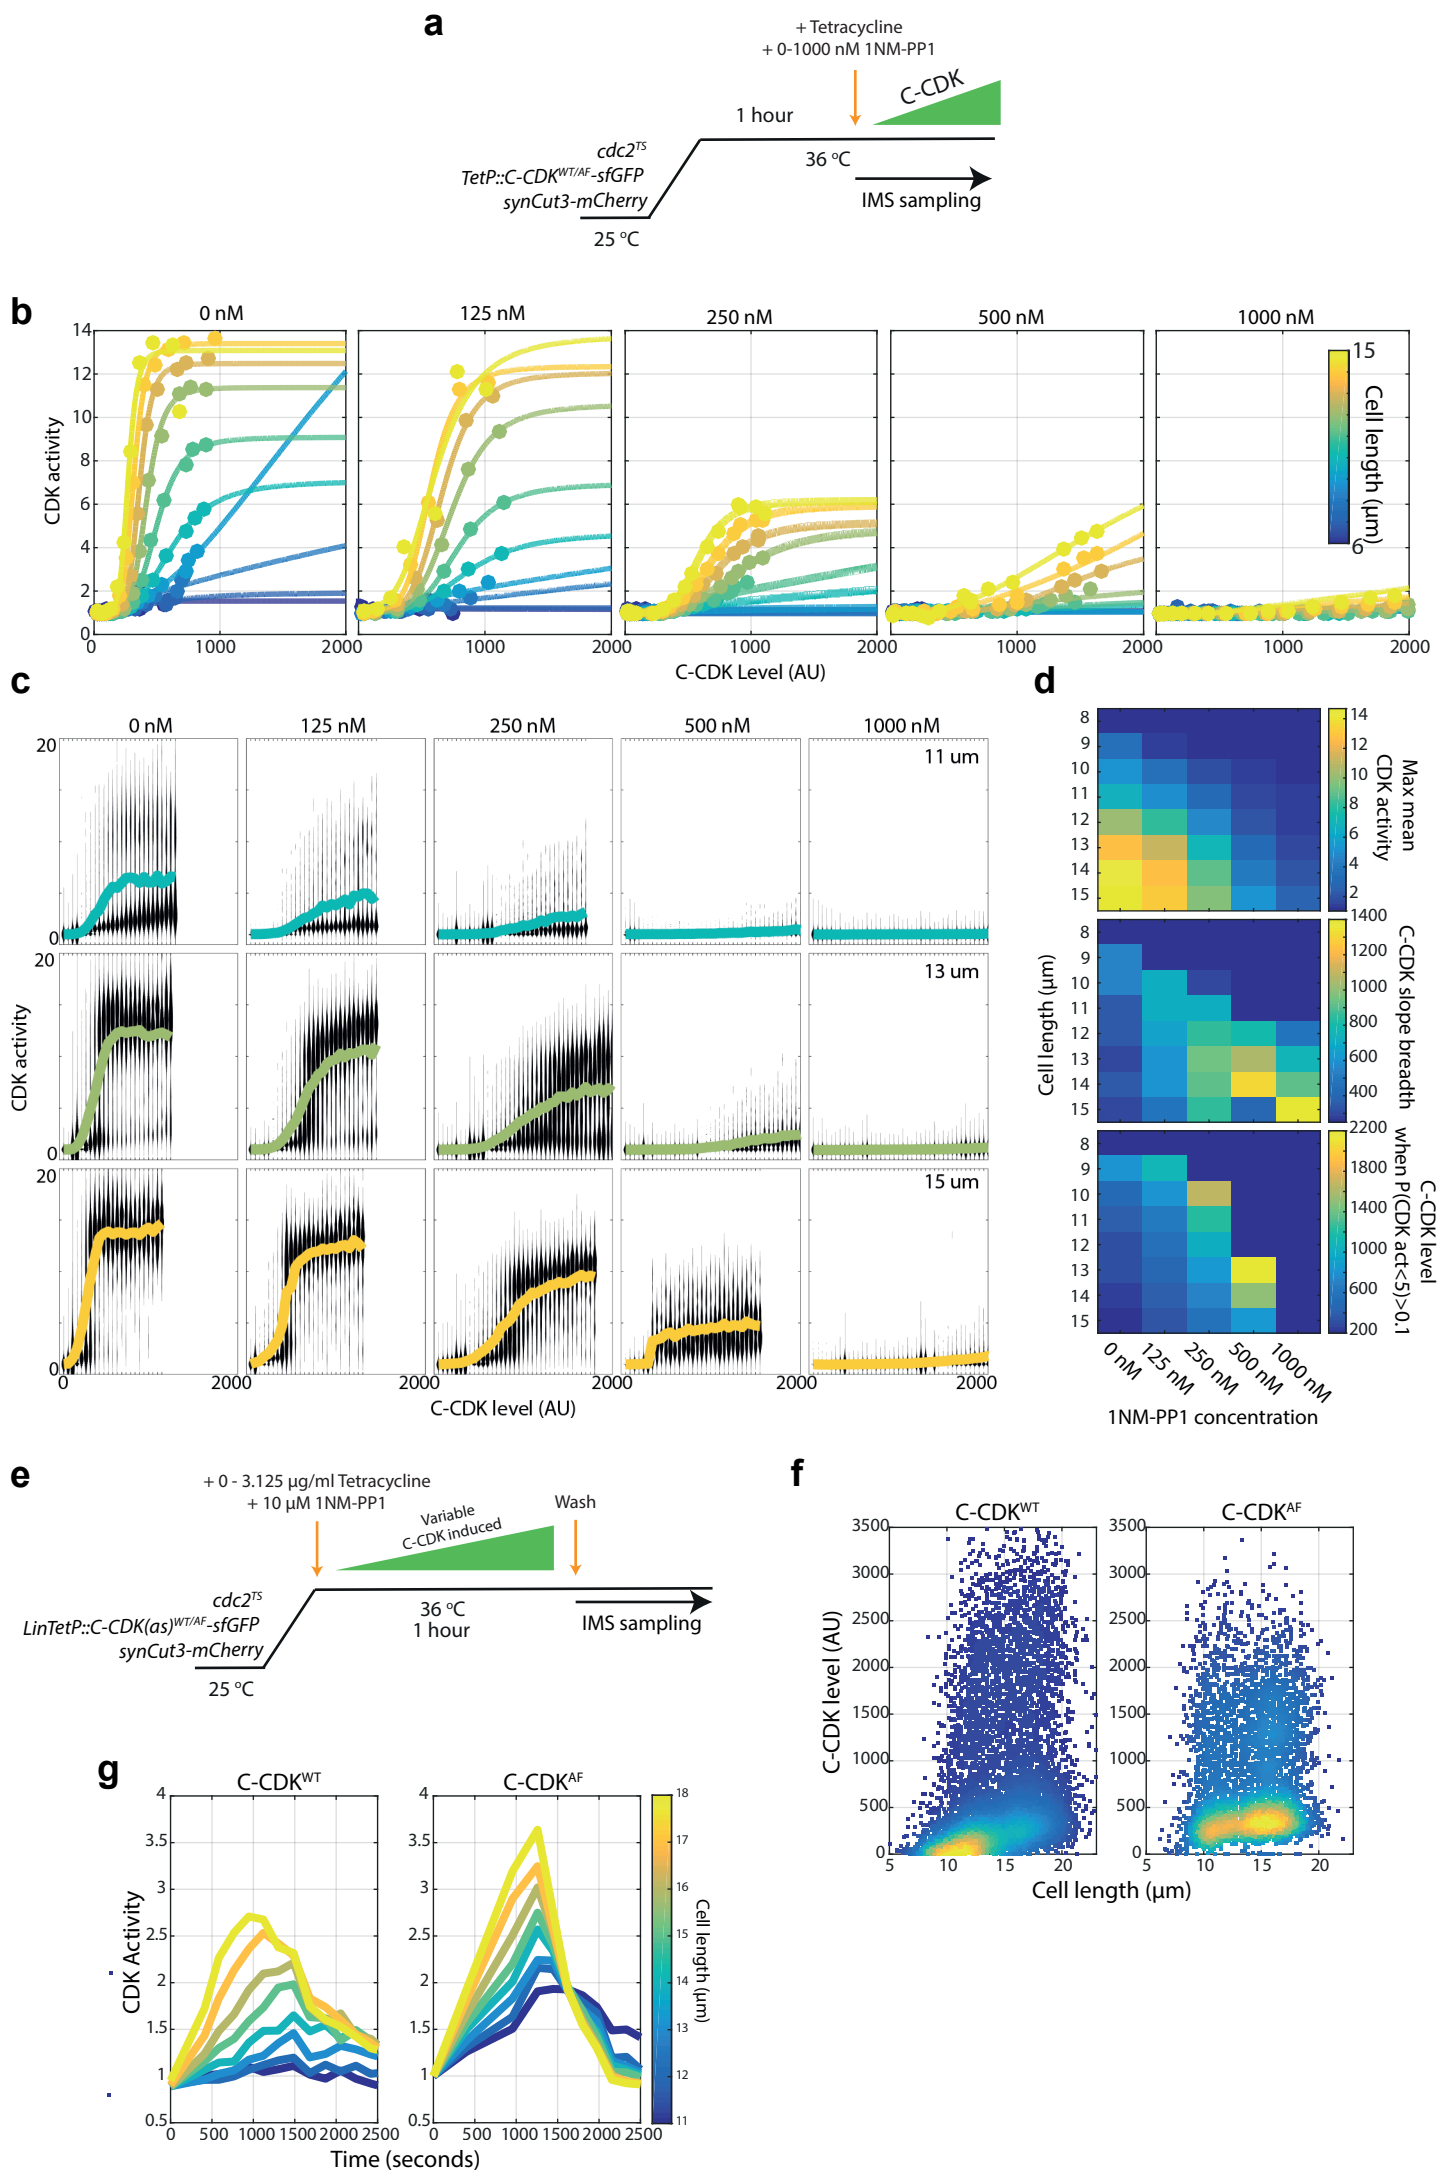

Figure 2, Figure Supplement 2

Supplement: supp [file elife_poa_e64592_Figure_2_figure_supplement_2.pdf › elife_poa_e64592_Figure_2_figure_supplement_2.pdf]
